# Supplementary material for: Filamentous phages prevalent in Pseudoalteromonas spp. confer properties advantageous to host survival in Arctic sea ice
Source: PubMed Central journal article supplement — ISME J. 2014 Oct 10;9(4):871–81. doi: 10.1038/ismej.2014.185 (PMC4817708; doi:10.1038/ismej.2014.185), 2014-10-10
Supplement: ismej2014185x1.pdf [file ismej2014185x1.pdf]

## Supplementary Information

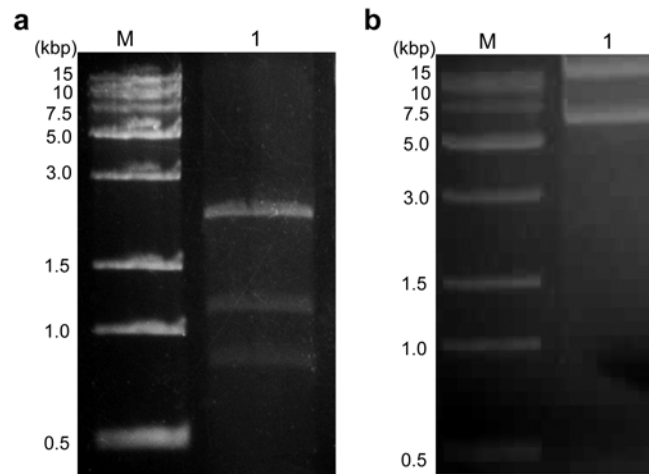

**Figure S1.** Agarose gel electrophoresis analysis of the digested RF327 by *Hind*III. (a) Digested RF327. Lanes: M, *Trans*15K DNA marker; 1, RF327 digested by *Hind*III. (b) Untreated RF327. Lanes: M, *Trans*15K DNA marker; 1, RF327.

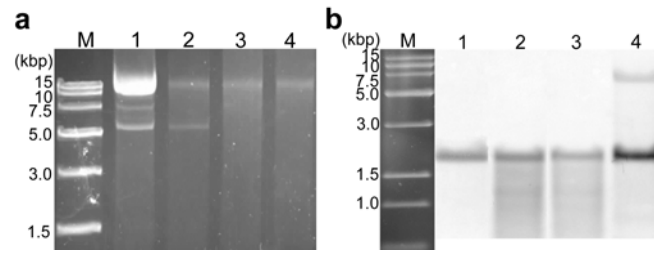

**Figure S2.** Verification of the RF327-cured host. (a) Agarose gel electrophoresis analysis of RF327 extracted from the RF-cured host strains. Lanes: M, *Trans15K* DNA marker (TransGen, China); 1, RF327 extracted from strain BSi20327 as the positive control; 2-4, RF327 extracted from high temperature treated host strains, showing that 3 and 4 had no RF327 detected. (b) Southern blot hybridization of BSi20327 and its RF-cured strain BSi20327A with ORF386 as a probe. Lanes: M, *Trans15K* DNA marker; 1, genomic DNA of BSi20327A treated with S1 nuclease prior to be digested by *HindIII*; 2, genomic DNA of BSi20327A digested by *HindIII*; 3, genomic DNA of BSi20327 treated with S1 nuclease prior to be digested by *HindIII*; 4, genomic DNA of BSi20327 digested by *HindIII*. The results indicate that phage ssDNA is not detectable in the RF-cured host strain BSi20327A.

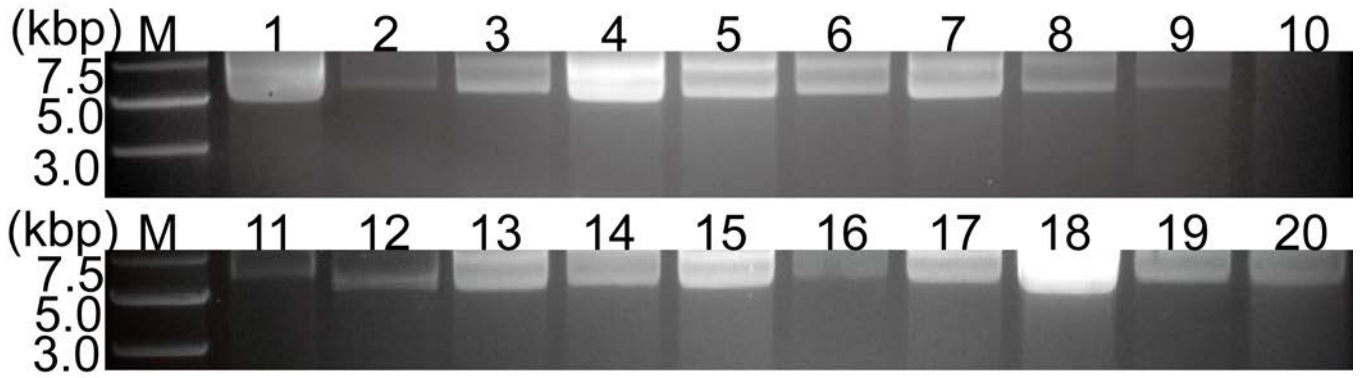

**Figure S3.** Agarose gel electrophoresis analysis of the replicative forms of phage isolated from 19 phage gene-containing strains. Lanes 1-20 were BSi20327, BSi20335, BSi20381, BSi20465, BSi20401, BSi20514, BSi20407, BSi20357, BSi20436, BSi20670, BSi20366, BSi20340, BSi20455, BSi20447, BSi20462, BSi20451, BSi20464, BSi20341, BSi20437 and BSi20439, respectively. Strain BSi20670 harboring no phage gene was used as the negative control.

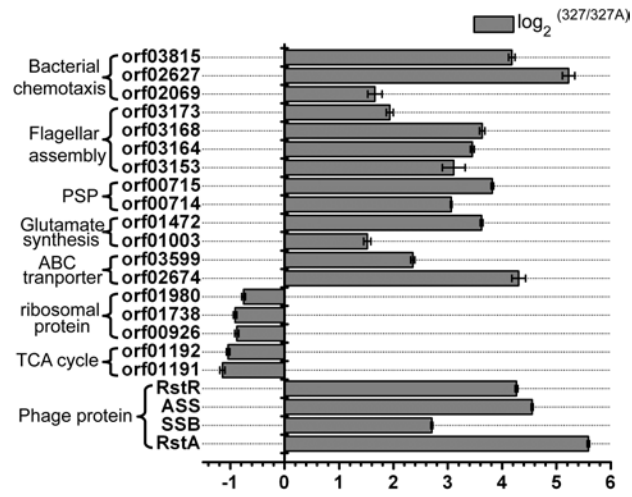

**Figure S4.** Verification of the whole-transcriptomes results by Real time-qPCR. Twenty two genes were selected to perform the verification. RstR, ASS, SSB, RstA were phage protein of f327.

They represent ORF37, ORF448, ORF116 and ORF386, respectively.

**Table S1. *Pseudoalteromonas* strains used in this study.**

| <b>Identification Number</b> | <b>Sampling Sites</b> | <b>Location of Sampling Sites</b> | <b>Identification Number</b> | <b>Sampling Sites</b> | <b>Location of Sampling Sites</b> |
|------------------------------|-----------------------|-----------------------------------|------------------------------|-----------------------|-----------------------------------|
| BSi20316                     | CNIS7                 | 78°23'14"N 149°06'55"W            | BSi20597                     | CNIS7                 | 78°23'14"N 149°06'55"W            |
| BSi20319                     | CNIS7                 | 78°23'14"N 149°06'55"W            | BSi20612                     | CNIS7                 | 78°23'14"N 149°06'55"W            |
| BSi20324                     | CNIS7                 | 78°23'14"N 149°06'55"W            | BSi20613                     | CNIS7                 | 78°23'14"N 149°06'55"W            |
| BSi20325                     | CNIS7                 | 78°23'14"N 149°06'55"W            | BSi20424                     | IS2                   | 74°41'11"N 164°04'28"W            |
| BSi20326                     | CNIS7                 | 78°23'14"N 149°06'55"W            | BSi20428                     | IS2                   | 74°41'11"N 164°04'28"W            |
| BSi20327                     | CNIS7                 | 78°23'14"N 149°06'55"W            | BSi20430                     | IS2                   | 74°41'11"N 164°04'28"W            |
| BSi20335                     | CNIS7                 | 78°23'14"N 149°06'55"W            | BSi20434                     | IS2                   | 74°41'11"N 164°04'28"W            |
| BSi20339                     | CNIS7                 | 78°23'14"N 149°06'55"W            | BSi20436                     | IS2                   | 74°41'11"N 164°04'28"W            |
| BSi20340                     | CNIS7                 | 78°23'14"N 149°06'55"W            | BSi20437                     | IS2                   | 74°41'11"N 164°04'28"W            |
| BSi20341                     | CNIS7                 | 78°23'14"N 149°06'55"W            | BSi20439                     | IS2                   | 74°41'11"N 164°04'28"W            |
| BSi20343                     | CNIS7                 | 78°23'14"N 149°06'55"W            | BSi20447                     | IS3                   | 75°28'52"N 152°51'18"W            |
| BSi20347                     | CNIS7                 | 78°23'14"N 149°06'55"W            | BSi20451                     | IS3                   | 75°28'52"N 152°51'18"W            |
| BSi20354                     | CNIS7                 | 78°23'14"N 149°06'55"W            | BSi20489                     | IS3                   | 75°28'52"N 152°51'18"W            |
| BSi20357                     | CNIS7                 | 78°23'14"N 149°06'55"W            | BSi20496                     | IS3                   | 75°28'52"N 152°51'18"W            |
| BSi20359                     | CNIS7                 | 78°23'14"N 149°06'55"W            | BSi20514                     | IS3                   | 75°28'52"N 152°51'18"W            |
| BSi20366                     | CNIS7                 | 78°23'14"N 149°06'55"W            | BSi20453                     | IS5                   | 77°30'59"N 152°52'04"W            |
| BSi20370                     | CNIS7                 | 78°23'14"N 149°06'55"W            | BSi20454                     | IS5                   | 77°30'59"N 152°52'04"W            |
| BSi20372                     | CNIS7                 | 78°23'14"N 149°06'55"W            | BSi20455                     | IS5                   | 77°30'59"N 152°52'04"W            |
| BSi20381                     | CNIS7                 | 78°23'14"N 149°06'55"W            | BSi20456                     | IS5                   | 77°30'59"N 152°52'04"W            |
| BSi20382                     | CNIS7                 | 78°23'14"N 149°06'55"W            | BSi20462                     | IS5                   | 77°30'59"N 152°52'04"W            |
| BSi20391                     | CNIS7                 | 78°23'14"N 149°06'55"W            | BSi20464                     | IS5                   | 77°30'59"N 152°52'04"W            |
| BSi20398                     | CNIS7                 | 78°23'14"N 149°06'55"W            | BSi20465                     | IS9                   | 80°11'50"N 146°46'10"W            |
| BSi20401                     | CNIS7                 | 78°23'14"N 149°06'55"W            | BSi20578                     | IS9                   | 80°11'50"N 146°46'10"W            |
| BSi20407                     | CNIS7                 | 78°23'14"N 149°06'55"W            | BSi20472                     | IS10                  | 79°17'36"N 151°50'49"W            |
| BSi20410                     | CNIS7                 | 78°23'14"N 149°06'55"W            | BSi20474                     | IS10                  | 79°17'36"N 151°50'49"W            |
| BSi20581                     | CNIS7                 | 78°23'14"N 149°06'55"W            | BSi20670                     | IS13                  | 77°30'03"N 162°29'22"W            |
| BSi20584                     | CNIS7                 | 78°23'14"N 149°06'55"W            |                              |                       |                                   |

Gray background represents the strains containing filamentous phage.

**Table S2.** Analysis of the ORFs on RF327 from *Pseudoalteromonas* sp. BSi20327

| ORF                | Homologous protein<br>(source species, accession no.)                                | Identity                 | Similarity               |
|--------------------|--------------------------------------------------------------------------------------|--------------------------|--------------------------|
| ORF63 <sup>a</sup> | transcriptional regulator<br>( <i>Marinobacter</i> sp. ES-1, WP 022988450)           | 36% (12/33) <sup>b</sup> | 61% (20/33) <sup>b</sup> |
| ORF386             | Replication initiation factor family<br>( <i>Vibrio harveyi</i> , ZP 01985526)       | 40% (155/383)            | 54% (209/383)            |
|                    | RstA phage-related replication protein<br>( <i>Vibrio cholerae</i> , ZP 04416969)    | 37% (134/367)            | 56% (208/367)            |
| ORF116             | putative ssDNA binding protein<br>( <i>Vibrio</i> phage KSF-1phi, YP 087071)         | 39% (31/80)              | 57% (46/80)              |
|                    | RstB phage-related integrase<br>( <i>Vibrio splendidus</i> , ZP 12592573)            | 43% (48/111)             | 65% (73/111)             |
| ORF65              | conserved hypothetical protein<br>( <i>Vibrio cholerae</i> , ZP 07008260)            | 32% (19/60)              | 48% (29/60)              |
| ORF74              | coat protein F<br>( <i>Haloplasma contractile</i> , WP 008825221)                    | 29% (19/65)              | 49% (32/65)              |
| ORF461             | Conserved hypothetical protein<br>( <i>Shewanella piezotolerans</i> , ACJ29305)      | 38% (52/137)             | 46% (64/137)             |
| ORF103             | minor coat protein<br>( <i>Ralstonia solanacearum</i> , YP 003745721)                | 34% (36/106)             | 51% (55/106)             |
|                    | integral membrane protein<br>( <i>Neisseria flavescens</i> , ZP 04757926)            | 30% (25/84)              | 59% (50/84)              |
| ORF448             | zonular occludens toxin<br>( <i>Vibrio scophthalmi</i> , ZP 08749162)                | 41% (132/320)            | 55% (179/320)            |
|                    | putative phage assembly protein<br>( <i>Ralstonia syzygii</i> , CCA84653)            | 31% (55/179)             | 45% (81/179)             |
| ORF37              | phage replication repressor RstR<br>( <i>Vibrio</i> phage CTXΦ, AAM70438)            | 46% (17/37)              | 75% (28/37)              |
|                    | RstR-like phage repressor protein<br>( <i>Haemophilus influenzae</i> , YP 001291604) | 51% (19/37)              | 75% (28/37)              |

<sup>a</sup> Number indicates the number of amino acids in the encoded protein.

<sup>b</sup> The ratio in the bracket indicates the number of amino acids with identity or similarity/total number of amino acids in the homologous region.

**Table S3. Identity of proteins between the phages from BSi20327 and BSi20439**

| ORF in BSi20327 | Identity <sup>a</sup> |
|-----------------|-----------------------|
| ORF63           | 98%                   |
| ORF386          | 99%                   |
| ORF116          | 68%                   |
| ORF65           | 100%                  |
| ORF74           | 85%                   |
| ORF461          | 74%                   |
| ORF103          | 89%                   |
| ORF448          | 93%                   |

<sup>a</sup> The ratio is the number of amino acids with identity or similarity/total number of amino acids in the homologous region.

**Table S4. Annotation of the differently expressed genes between BSi20327 and BSi20327A.**

| ORF number | Description                                     | ORF number | Description                                                 |
|------------|-------------------------------------------------|------------|-------------------------------------------------------------|
| orf4084    | major capsid protein of f327                    | orf03163   | flagellar hook-length control protein FliK                  |
| orf4085    | ssDNA binding protein of f327                   | orf03164   | flagellar protein FliJ                                      |
| orf4087    | replication protein of f327                     | orf03165   | flagellum-specific ATP synthase FliI                        |
| orf4088    | transcriptional regulator of f327               | orf03166   | flagellar assembly protein FliH                             |
| orf01191   | succinyl-CoA synthetase beta subunit            | orf03168   | flagellar MS-ring protein FliF                              |
| orf01192   | succinyl-CoA synthetase subunit alpha           | orf03169   | flagellar hook-basal body complex protein FliE              |
| orf01188   | succinate dehydrogenase iron-sulfur subunit     | orf03170   | sigma-54 dependent response regulator FlrC                  |
| orf01186   | succinate dehydrogenase membrane anchor subunit | orf03171   | Flagellar assembly sensory box sensor histidine kinase FlrB |
| orf02045   | transcription elongation factor                 | orf03173   | Flagellar regulatory protein FlrA                           |
| orf00432   | 50S ribosomal protein L19                       | orf03177   | flagellar hook-associated protein FliD                      |
| orf00484   | 30S ribosomal subunit protein S15               | orf03955   | flagellar basal body rod protein FlgF                       |
| orf00892   | 50S ribosomal protein L20                       | orf03956   | flagellar basal body rod protein FlgG                       |
| orf00926   | small subunit ribosomal protein S1              | orf03958   | flagellar P-ring protein precursor FlgI                     |
| orf01736   | large subunit ribosomal protein L7/L12          | orf03962   | flagellar hook-associated protein FlgK                      |
| orf01738   | large subunit ribosomal protein L1              | orf03963   | flagellar hook-associated protein FlgL                      |
| orf01739   | 50S ribosomal protein L11                       | orf00154   | chemotaxis protein CheY                                     |
| orf01824   | 30S ribosomal protein S3                        | orf00438   | diguanylate phosphodiesterase                               |
| orf01980   | large subunit ribosomal protein L17             | orf00458   | diguanylate phosphodiesterase                               |
| orf01985   | 50S ribosomal protein L36                       | orf00583   | GGDEF domain protein                                        |
| orf01987   | large subunit ribosomal protein L15             | orf01012   | response regulator                                          |
| orf01991   | large subunit ribosomal protein L6              | orf01313   | signaling protein ykoW                                      |



| ORF number | Description                                                          | ORF number | Description                               |
|------------|----------------------------------------------------------------------|------------|-------------------------------------------|
| orf01994   | large subunit ribosomal protein L5                                   | orf01527   | hemolysin secretion protein               |
| orf01995   | 50S ribosomal protein L24                                            | orf01563   | methyl-accepting chemotaxis protein       |
| orf01996   | 50S ribosomal protein L14                                            | orf01564   | methyl-accepting chemotaxis protein       |
| orf02674   | polar amino acid transport system permease protein                   | orf01699   | methyl-accepting chemotaxis protein       |
| orf01862   | branched-chain amino acid transport system substrate-binding protein | orf02069   | chemotaxis protein CheW                   |
| orf01003   | glutamate synthase                                                   | orf02071   | CheA signal transduction histidine kinase |
| orf01472   | glutamate-5-semialdehyde dehydrogenase                               | orf02500   | methyl-accepting chemotaxis protein       |
| orf00714   | phage shock protein A                                                | orf02516   | methyl-accepting chemotaxis protein       |
| orf00715   | phage shock protein C                                                | orf02627   | methyl-accepting chemotaxis protein       |
| orf03442   | transcriptional activator of the Psp operon with PspB                | orf02855   | CheB/CheR fusion protein                  |
| orf03443   | phage shock protein B                                                | orf02923   | sensor kinase CheA                        |
| orf02824   | flagellar motor switch protein FliG                                  | orf03022   | biofilm dispersion protein BdlA           |
| orf02825   | flagellar assembly protein FliH                                      | orf03144   | chemotaxis protein MotB                   |
| orf03145   | flagellar motor protein MotA/chemotaxis protein MotA                 | orf03146   | response regulator CheB                   |
| orf03153   | flagellar biosynthesis protein FlhA                                  | orf03324   | CheB/CheR fusion protein                  |
| orf03154   | flagellar biosynthesis protein FlhB                                  | orf03516   | methyl-accepting chemotaxis protein       |
| orf03155   | flagellar biosynthesis protein FliR                                  | orf03815   | EAL domain protein                        |
| orf03157   | flagellar biosynthetic protein FliP                                  |            |                                           |

**Table S5. Primers used in this study**

| Primer    | Sequence (5'-3')                                 | Primer    | Sequence (5'-3')       |
|-----------|--------------------------------------------------|-----------|------------------------|
| 386F      | ATGAATTATCAATATAGTGACCG<br>TGC                   | orf00714R | GCTTGTGTTTATTGCTTATTG  |
| 448R      | AAATTGAGCTAGGTATATATTTT<br>TACC                  | orf00715F | TGTCTGTAGTGGGTTAGC     |
| 70F       | ACGACTGACCCGGTACGCATGTA<br>YATGMGNGARATGGGNACNGT | orf00715R | GACAACAGTGTGCGATTA     |
| 70R       | ATAGAAATAACCAGACGTAAGT<br>TNGCYTCNACCATYTCYTTYTT | orf03164F | ACGCTGGCTTACTACTTG     |
| rpoDF     | TTCTTCTTCGTCTTCATCATC                            | orf03164R | AGGTCAATCGGGCTTATC     |
| rpoDR     | CTTAGCGACATTATCTCTGG                             | orf03168F | CACGGACACACTTATTCTG    |
| orf01191F | ACACCAGAACTTATCCACAA                             | orf03168R | TACCTGAAGATGCGATGG     |
| orf01191R | GTTGCCAAGACCCATAAAG                              | orf03153F | CAAGTCCTGGTTCTATTCC    |
| orf01192F | TCCTGGTGAGACTAAGATTG                             | orf03153R | AAGATGCTGTTGGTATGTC    |
| orf01192R | CCAACACAAGAAGACTGAC                              | orf03173F | ATCACGCTCCATCAGTTC     |
| orf01738F | TTTAGGGTTTGGCATTAGAC                             | orf03173R | GCTGGCTAATCTTGTTGAG    |
| orf01738R | GCTGAATTAGTAGGCATGGAA                            | orf03815F | AAGGCGTTCTTTCCACTG     |
| orf01980F | GCGTCTTCTTGAACCTCTTC                             | orf03815R | GCACTTGGCGTAAATAGC     |
| orf01980R | AATCGGTCCTCGTAATGC                               | orf02627F | ACCACTTCACTGTAATAATCAC |
| orf00926F | TGTGAAGAGCAAGAGACT                               | orf02627R | TAGATAACGCACTGAGACAA   |
| orf00926R | TACTGGACGAACATCAACA                              | orf02069F | AATCAATTAAGGCGACCATT   |
| orf02674F | ATGTCGTCCATCACAATATG                             | orf02069R | GCAGTGGCAGATGTTTATAG   |
| orf02674R | CACAGTCAGCCATTATTTCT                             | RstAF     | TTAGCCAGTAGAGTGAAGTG   |
| orf03599F | GCCTTGTTGCTCAGTAAT                               | RstAR     | GGTGTTAGGTATATCCAAAGAC |
| orf03599R | GCGGTGCTCAATACTTAG                               | SSBF      | AAGAGCCTTTAGCAATTAAC   |
| orf01003F | TTAGTGCGATGCGATAGC                               | SSBR      | AACAGGTATGATTTCAACAAC  |
| orf01003R | GTCTTGATTGCGGTAACC                               | ASSF      | TGAGATTTGCCAAGACTATG   |
| orf01472F | TCGGTTGTTATGGTTAATGC                             | ASSR      | TCATCATCACCGATAAGAATAG |
| orf01472R | TTCAGTGGTTAATGACTCAAG                            | RstRF     | AGTCGTCTTCGGTGATTAC    |
| orf00714F | AACTACTTAATTTGATGCTAACC                          | RstRR     | CGTGGAGGAAAGTGGAAC     |

Gray background represents the primers used in real time-qPCR.
